# Supplementary material for: Comparative analysis of flavonoids, polyphenols and volatiles in roots, stems and leaves of five mangroves
Source: PeerJ journal article supplement (doi:10.7717/peerj.15529), 2023-06-22

# MONOTERPENOID BIOSYNTHESIS

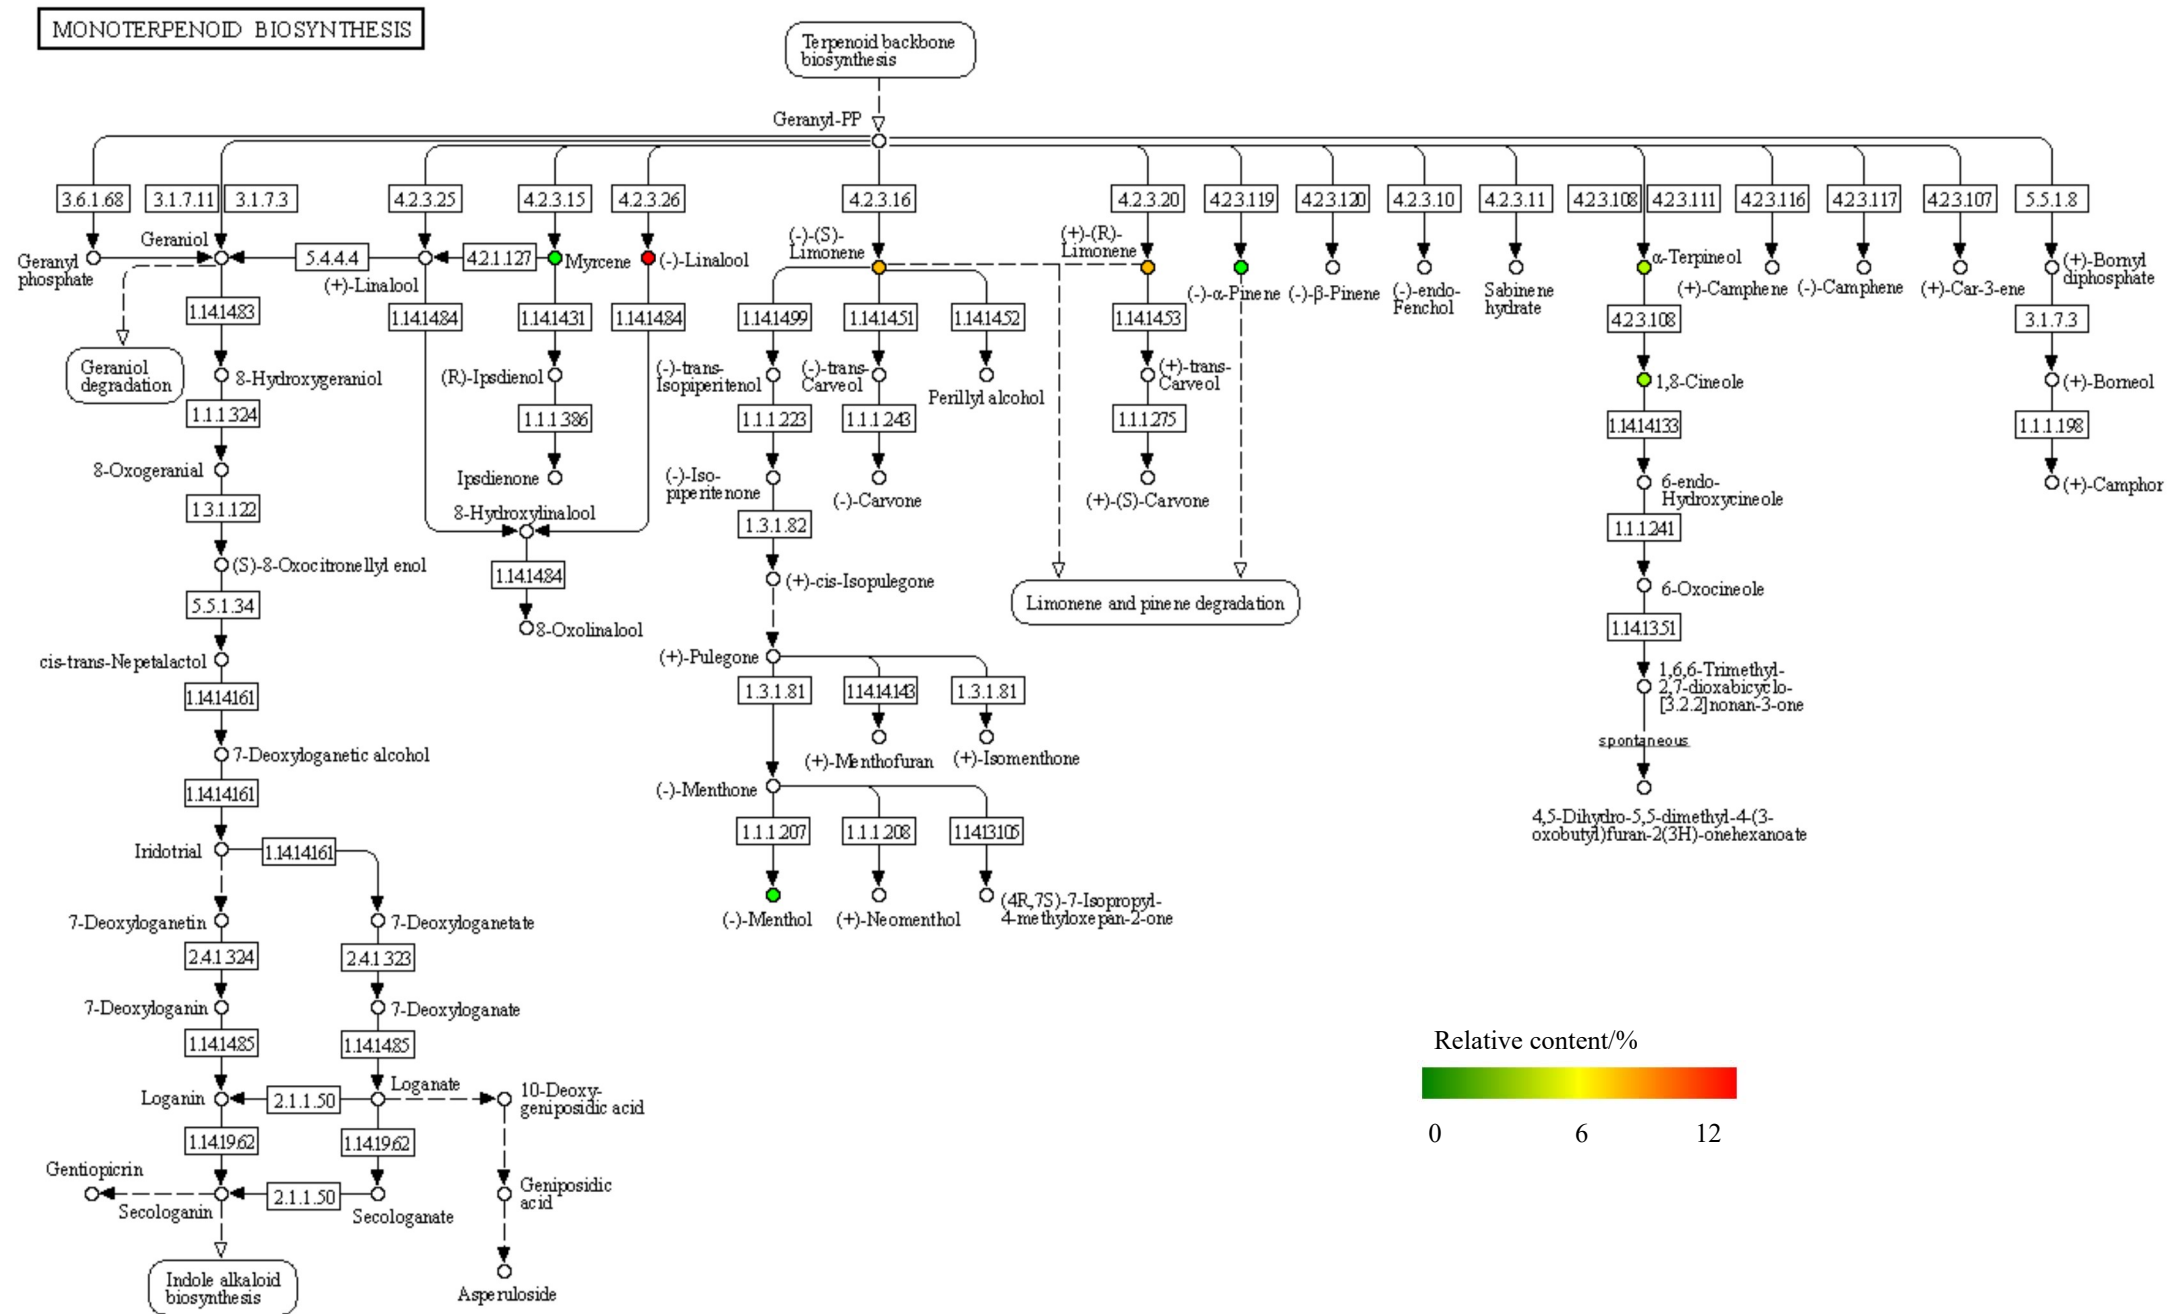

Supplement: Figure_S5.pdf [file Figure_S5.pdf]
