# Supplementary material for: Comparative analysis of flavonoids, polyphenols and volatiles in roots, stems and leaves of five mangroves
Source: PeerJ journal article supplement (doi:10.7717/peerj.15529), 2023-06-22
Supplement: GCMSData.zip [file Data_for_figure5_to_figure8_71_common_compounds.xlsx]

## Sheet: 71commond compounds content dat
repl（plants）	compouds	Retention time /min	AI_leaf	AI__root	AI_stem	BG_leaf	BG__root	BG_stem	AG_leaf	AG__root	AG_stem	KC_leaf	KC__root	KC_stem	AM_leaf	AM__root	AM_stem
1	Acetic acid, ethyl ester	2.244	n/a	n/a	n/a	0.04	n/a	n/a	n/a	n/a	n/a	n/a	n/a	n/a	0.26	0.19	n/a
1	UREA	2.624	n/a	n/a	0.08	n/a	n/a	0.07	n/a	0.11	n/a	n/a	n/a	0.43	0.36	0.46	0.11
1	1-Penten-3-ol	2.979	n/a	n/a	n/a	n/a	n/a	n/a	n/a	0.12	n/a	n/a	n/a	n/a	n/a	n/a	n/a
1	3-PENTANONE	3.182	n/a	n/a	n/a	0.44	0.02	0.04	n/a	n/a	0.04	n/a	n/a	n/a	n/a	n/a	n/a
1	1-Butanol, 3-methyl- (impure)	3.827	n/a	n/a	n/a	n/a	n/a	n/a	n/a	n/a	n/a	0.35	0.24	0.26	2.27	0.65	1.22
1	1-Pentanol	4.512	n/a	n/a	n/a	n/a	n/a	n/a	n/a	0.34	n/a	n/a	n/a	n/a	n/a	n/a	n/a
1	Hexanal	5.227	n/a	0.15	0.1	n/a	0.06	n/a	n/a	0.27	n/a	n/a	n/a	n/a	n/a	n/a	n/a
1	3-Hexen-1-ol	6.718	n/a	n/a	n/a	4.89	0.75	0.5	4.51	n/a	n/a	0.2	2.54	2.48	n/a	n/a	n/a
1	1-HEXANOL	7.177	n/a	0.84	0.19	0.46	2.25	0.39	0.46	1.19	n/a	6.64	19.34	1.22	n/a	1.81	1.43
1	Cyclohexanol	7.619	n/a	n/a	n/a	n/a	n/a	n/a	n/a	n/a	n/a	0.52	0.57	n/a	n/a	n/a	n/a
1	1,3,5,7-Cyclooctatetraene	7.783	n/a	n/a	n/a	n/a	n/a	n/a	n/a	n/a	n/a	n/a	n/a	n/a	3.66	1.82	13.21
1	Oxime-, methoxy-phenyl-	8.5	3.98	14.18	18.98	2.04	4.42	4.5	4.97	n/a	1.14	7.51	5.96	3.81	n/a	n/a	n/a
1	Benzene, 1-(dimethoxymethyl)-4-(1-methoxy-1-methylethyl)-	9.986	n/a	1.87	1.92	0.25	0.52	0.38	1.22	1.03	0.48	1.04	0.62	1.1	1.15	0.93	n/a
1	1-Heptanol	10.375	n/a	n/a	n/a	n/a	n/a	n/a	n/a	n/a	n/a	0.09	0.19	n/a	n/a	0.43	n/a
1	1-Octen-3-ol	10.648	n/a	n/a	n/a	n/a	n/a	n/a	n/a	n/a	n/a	n/a	n/a	n/a	n/a	n/a	9.52
1	3-Octanone	10.861	0.62	n/a	3.71	1.74	2.95	6.62	n/a	0.53	0.13	n/a	n/a	n/a	4.49	1.27	4.77
1	Furan, 2-pentyl-	11.024	n/a	0.69	0.45	0.05	1.36	0.5	0.26	1.85	0.51	0.25	1.25	1.64	0.45	3.97	2.15
1	3-Octanol	11.169	0.63	0.47	3.2	5.78	0.32	4.49	n/a	n/a	n/a	n/a	0.11	0.3	2.26	0.16	3.22
1	Octanal	11.386	n/a	n/a	n/a	n/a	n/a	n/a	n/a	0.58	n/a	0.23	0.17	0.26	n/a	n/a	n/a
1	l-Limonene	12.236	n/a	n/a	n/a	0.1	n/a	0.18	0.66	0.95	n/a	0.55	n/a	1.9	0.88	1.03	0.64
1	1,8-Cineole	12.325	n/a	0.47	0.29	n/a	0.18	0.09	0.25	0.46	n/a	0.2	0.28	0.62	0.16	0.38	0.18
1	1-Octanol	13.609	n/a	n/a	n/a	n/a	2.46	n/a	n/a	n/a	n/a	n/a	n/a	n/a	n/a	n/a	n/a
1	2-Nonanone	14.279	n/a	n/a	n/a	n/a	n/a	n/a	n/a	0.35	0.05	n/a	n/a	n/a	0.36	1.7	0.49
1	.ALPHA.-TERPINOLENE	14.542	n/a	n/a	n/a	0.13	0.58	0.29	n/a	n/a	n/a	n/a	n/a	n/a	n/a	n/a	n/a
1	Nonanal	14.667	0.42	0.25	0.2	n/a	0.48	0.12	0.85	2.06	0.45	0.7	0.97	0.59	0.47	0.79	0.6
1	2,5-Dihydroxybenzaldehyde, 2TMS derivative	15.062	n/a	n/a	n/a	n/a	n/a	n/a	n/a	n/a	n/a	n/a	n/a	n/a	n/a	0.69	0.52
1	Camphor	16	n/a	n/a	n/a	n/a	n/a	n/a	n/a	n/a	n/a	n/a	0.09	0.1	n/a	0.08	0.06
1	Ethanone, 1-(2-methylphenyl)-	16.218	n/a	n/a	n/a	n/a	n/a	n/a	n/a	n/a	n/a	n/a	n/a	n/a	8.44	0.78	1.55
1	1-Nonanol	16.81	n/a	n/a	n/a	n/a	0.11	n/a	n/a	n/a	n/a	n/a	n/a	n/a	n/a	n/a	n/a
1	(+)-Isomenthol	16.888	n/a	0.88	0.44	n/a	0.52	0.24	n/a	1.67	0.35	n/a	0.93	1.24	n/a	1.5	1.04
1	3-Cyclohexen-1-ol, 4-methyl-1-(1-methylethyl)-	17.033	n/a	n/a	n/a	0.04	0.18	0.08	0.12	0.54	0.13	0.18	0.4	0	0.32	0.65	0.48
1	1H-Indene, 1-methylene-	17.203	n/a	n/a	n/a	n/a	n/a	n/a	n/a	n/a	n/a	n/a	n/a	n/a	n/a	0.27	n/a
1	Terpineol	17.45	n/a	n/a	n/a	n/a	n/a	n/a	n/a	n/a	n/a	n/a	n/a	n/a	n/a	0.56	0.3
1	3-Cyclohexene-1-methanol, .alpha.,.alpha.,4-trimethyl-, (S)-	17.454	n/a	n/a	n/a	n/a	n/a	n/a	n/a	n/a	n/a	n/a	0.22	0.77	n/a	n/a	n/a
1	Benzoic acid, 2-hydroxy-, methyl ester	17.557	n/a	n/a	n/a	0.16	n/a	0.08	n/a	n/a	n/a	0.53	n/a	1.79	n/a	n/a	1.04
1	Hexadecane, 2,6,10,14-tetramethyl-	17.654	0.72	n/a	0.53	n/a	0.03	0.02	n/a	n/a	n/a	0.12	0.09	0.14	n/a	n/a	0.1
1	Decanal	17.84	n/a	n/a	n/a	0.08	0.1	0.05	0.26	0.31	n/a	n/a	n/a	n/a	n/a	n/a	n/a
1	2-Nonenal, (Z)-	19.528	n/a	n/a	n/a	n/a	n/a	n/a	n/a	n/a	n/a	n/a	0.12	0.13	n/a	n/a	n/a
1	1-Undecanol	20.385	n/a	n/a	n/a	n/a	n/a	n/a	n/a	0.1	n/a	n/a	n/a	n/a	n/a	n/a	n/a
1	2-Undecanone	19.528	n/a	n/a	n/a	n/a	0.43	0.13	n/a	0.84	0.23	n/a	n/a	n/a	n/a	n/a	n/a
1	Naphthalene, 1-methyl-	20.536	0.19	n/a	0.83	n/a	n/a	0.05	1.85	0.44	0.25	n/a	0.1	0.18	2.39	0.13	n/a
1	1H-Indene, 1-ethylidene-	20.544	n/a	n/a	n/a	n/a	n/a	n/a	n/a	n/a	n/a	n/a	0.22	n/a	n/a	n/a	n/a
1	1,4-Methanonaphthalene, 1,4-dihydro-	20.545	n/a	0.45	0.46	n/a	n/a	n/a	n/a	n/a	n/a	n/a	n/a	n/a	n/a	n/a	n/a
1	Tetradecane	20.625	n/a	n/a	n/a	n/a	n/a	n/a	0.31	0.31	0.07	n/a	n/a	n/a	n/a	0.35	n/a
1	Naphthalene, decahydro-, cis-	20.727	n/a	n/a	n/a	n/a	n/a	n/a	n/a	n/a	0.185	0.22	0.07	n/a	n/a	n/a	n/a
1	Germacrene D	21.859	n/a	n/a	n/a	n/a	0.19	n/a	n/a	n/a	n/a	n/a	0.08	0.11	n/a	n/a	n/a
1	.alpha.-Amorphene	23.026	n/a	0.47	0.32	n/a	0.09	0.07	n/a	n/a	n/a	n/a	0.27	0.43	n/a	0.36	0.33
1	1-Tetradecanol	23.198	n/a	n/a	n/a	n/a	n/a	n/a	n/a	n/a	n/a	0.48	n/a	n/a	n/a	n/a	n/a
1	Pentadecane	23.409	n/a	n/a	n/a	n/a	n/a	n/a	n/a	n/a	n/a	n/a	n/a	n/a	0.3	n/a	0.33
1	Heptadecane, 2,6,10,15-tetramethyl-	23.414	n/a	n/a	n/a	n/a	0.15	0.04	n/a	0.12	n/a	0.12	n/a	0.17	0.17	n/a	0.18
1	Hexadecane	23.415	n/a	n/a	0.26	n/a	n/a	n/a	n/a	n/a	n/a	n/a	n/a	n/a	n/a	n/a	n/a
1	,TRANS-.ALPHA.-BERGAMOTENE	23.678	n/a	0.18	0.17	0.05	0.14	0.04	0.49	6.72	1.13	0.29	0.36	0.74	0.13	1.45	0.24
1	trans-Caryophyllene	24.162	n/a	0.24	0.61	n/a	n/a	n/a	n/a	n/a	n/a	0.14	0.36	2.45	2.6	0.88	1.7
1	(+)-.BETA.-FUNEBRENE	24.222	0.24	n/a	n/a	n/a	0.06	n/a	n/a	0.15	n/a	n/a	n/a	n/a	n/a	n/a	n/a
1	Pentatriacontane	24.916	n/a	n/a	n/a	n/a	n/a	n/a	n/a	n/a	n/a	0.16	n/a	0.23	n/a	n/a	n/a
1	.alpha.-Humulene	25.077	n/a	n/a	n/a	n/a	n/a	n/a	n/a	n/a	n/a	n/a	n/a	n/a	0.95	0.37	0.75
1	Octane	25.082	n/a	n/a	n/a	n/a	n/a	n/a	n/a	n/a	n/a	n/a	0.09	0.17	n/a	n/a	n/a
1	Undecanal	26.358	n/a	n/a	n/a	n/a	n/a	n/a	0.35	1.49	n/a	n/a	n/a	n/a	n/a	n/a	n/a
1	Phenol, 2,6-bis(1,1-dimethylethyl)-4-methyl-	26.497	n/a	n/a	n/a	n/a	n/a	n/a	0.13	n/a	n/a	n/a	0.08	0.13	n/a	n/a	n/a
1	Benzene, 1,2,3-trimethoxy-5-(2-propenyl)-	27.528	0.32	n/a	n/a	n/a	0.4	n/a	n/a	n/a	n/a	2.79	0.65	1.06	0.6	n/a	1.04
1	3-Hexen-1-ol, benzoate, (Z)-	27.969	0.65	n/a	n/a	0.12	n/a	n/a	1.4	n/a	n/a	0.94	n/a	0.5	n/a	n/a	n/a
1	Hexadecanoic acid, ethyl ester	28.429	n/a	n/a	n/a	n/a	n/a	n/a	n/a	n/a	n/a	n/a	n/a	n/a	0.23	n/a	0.08
1	1,2-Benzenedicarboxylic acid, diethyl ester	28.536	1	1.56	1.45	n/a	n/a	n/a	0.11	0.33	0.2	n/a	n/a	n/a	n/a	n/a	n/a
1	1-Iodo-2-methylnonane	28.55	n/a	n/a	n/a	n/a	n/a	n/a	n/a	n/a	n/a	n/a	n/a	n/a	n/a	n/a	0.37
1	Decane, 2-methyl-	28.553	n/a	n/a	n/a	n/a	n/a	n/a	n/a	0.77	0.3	n/a	n/a	n/a	n/a	n/a	n/a
1	.alpha.-Cedrol	28.936	2.54	0.39	0.24	n/a	0.1	n/a	n/a	0.81	0.23	n/a	0.36	0.12	n/a	n/a	n/a
1	Octane, 3,5-dimethyl-	29.728	n/a	n/a	0.22	n/a	0.08	n/a	n/a	0.26	0.1	n/a	n/a	n/a	n/a	n/a	n/a
1	Dodecane, 2,6,10-trimethyl-	33.393	n/a	n/a	n/a	n/a	0.18	n/a	n/a	n/a	0.23	n/a	n/a	n/a	n/a	n/a	n/a
1	1,2-Benzenedicarboxylic acid, bis(2-methylpropyl) ester	34.753	0.6	0.45	1.45	n/a	n/a	n/a	n/a	0.33	0.2	n/a	n/a	n/a	n/a	n/a	n/a
1	1,2-Benzenedicarboxylic acid, dibutyl ester	36.723	0.36	n/a	n/a	n/a	n/a	n/a	n/a	n/a	n/a	n/a	n/a	n/a	n/a	n/a	n/a
1	3-Acetyl-2-methyl-9b-(1-naphthyl)-3aH-benzo[e]cyclohexa[1,2-b]furan	37.001	n/a	n/a	n/a	n/a	n/a	n/a	n/a	0.14	0.07	0.1	0.06	0.15	0.16	0.12	0.16
2	Acetic acid, ethyl ester	2.244	n/a	n/a	n/a	n/a	0.06	n/a	n/a	n/a	n/a	n/a	n/a	n/a	n/a	0.3	0.21
2	UREA	2.624	n/a	n/a	n/a	0.11	n/a	n/a	0.09	0.02	0.13	0.03	n/a	n/a	0.43	0.38	0.5
2	1-Penten-3-ol	2.979	n/a	n/a	n/a	n/a	n/a	n/a	n/a	n/a	0.12	n/a	n/a	n/a	n/a	n/a	n/a
2	3-PENTANONE	3.182	n/a	n/a	n/a	n/a	0.47	0.06	0.05	0.02	0.03	0.05	n/a	n/a	n/a	n/a	n/a
2	1-Butanol, 3-methyl- (impure)	3.827	n/a	n/a	n/a	n/a	n/a	n/a	n/a	n/a	n/a	n/a	0.38	0.27	0.29	2.27	0.66
2	1-Pentanol	4.512	n/a	n/a	n/a	n/a	n/a	n/a	n/a	n/a	0.35	n/a	n/a	n/a	n/a	n/a	n/a
2	Hexanal	5.227	n/a	n/a	0.15	0.11	n/a	0.07	n/a	n/a	0.3	n/a	n/a	n/a	n/a	n/a	n/a
2	3-Hexen-1-ol	6.718	n/a	n/a	n/a	n/a	4.93	0.79	0.51	4.53	0.01	0.03	0.23	2.56	2.51	n/a	n/a
2	1-HEXANOL	7.177	n/a	n/a	0.85	0.2	0.49	2.28	0.43	0.48	1.21	0.01	6.65	19.36	1.25	n/a	1.82
2	Cyclohexanol	7.619	n/a	n/a	n/a	n/a	n/a	n/a	n/a	n/a	n/a	n/a	0.55	0.58	n/a	n/a	n/a
2	1,3,5,7-Cyclooctatetraene	7.783	n/a	n/a	n/a	n/a	n/a	n/a	n/a	n/a	n/a	n/a	n/a	n/a	n/a	3.69	1.83
2	Oxime-, methoxy-phenyl-	8.5	3.98	4.01	14.22	18.98	2.08	4.42	4.53	4.98	0.02	1.17	7.52	5.99	3.81	n/a	n/a
2	Benzene, 1-(dimethoxymethyl)-4-(1-methoxy-1-methylethyl)-	9.986	n/a	n/a	1.89	1.94	0.25	0.55	0.4	1.23	1.05	0.48	1.06	0.63	1.11	1.18	0.95
2	1-Heptanol	10.375	n/a	n/a	n/a	n/a	n/a	n/a	n/a	n/a	n/a	n/a	0.12	0.2	n/a	n/a	0.47
2	1-Octen-3-ol	10.648	n/a	n/a	n/a	n/a	n/a	n/a	n/a	n/a	n/a	n/a	n/a	n/a	n/a	n/a	0.01
2	3-Octanone	10.861	0.62	0.66	n/a	3.71	1.76	2.95	6.65	0.01	0.56	0.17	n/a	n/a	n/a	4.5	1.27
2	Furan, 2-pentyl-	11.024	n/a	n/a	0.69	0.47	0.09	1.37	0.52	0.28	1.88	0.53	0.28	1.25	1.67	0.46	3.97
2	3-Octanol	11.169	0.63	0.67	0.47	3.23	5.79	0.33	4.5	0.02	0.01	0.01	n/a	0.14	0.34	2.26	0.2
2	Octanal	11.386	n/a	n/a	n/a	n/a	n/a	n/a	n/a	n/a	0.59	n/a	0.23	0.21	0.29	n/a	n/a
2	l-Limonene	12.236	n/a	n/a	n/a	n/a	0.13	n/a	0.18	0.67	0.96	0.02	0.57	n/a	1.9	0.91	1.07
2	1,8-Cineole	12.325	n/a	n/a	0.47	0.32	n/a	0.19	0.1	0.27	0.47	n/a	0.21	0.28	0.63	0.2	0.4
2	1-Octanol	13.609	n/a	n/a	n/a	n/a	n/a	2.49	n/a	n/a	n/a	n/a	n/a	n/a	n/a	n/a	n/a
2	2-Nonanone	14.279	n/a	n/a	n/a	n/a	n/a	n/a	n/a	n/a	0.36	0.07	n/a	n/a	n/a	0.37	1.72
2	.ALPHA.-TERPINOLENE	14.542	n/a	n/a	n/a	n/a	0.16	0.58	0.33	0.01	0.01	0.03	n/a	n/a	n/a	n/a	n/a
2	Nonanal	14.667	0.42	0.45	0.29	0.23	n/a	0.51	0.15	0.86	2.09	0.46	0.7	0.98	0.62	0.48	0.82
2	2,5-Dihydroxybenzaldehyde, 2TMS derivative	15.062	n/a	n/a	n/a	n/a	n/a	n/a	n/a	n/a	n/a	n/a	n/a	n/a	n/a	n/a	0.71
2	Camphor	16	n/a	n/a	n/a	n/a	n/a	n/a	n/a	n/a	n/a	n/a	n/a	0.11	0.11	n/a	0.1
2	Ethanone, 1-(2-methylphenyl)-	16.218	n/a	n/a	n/a	n/a	n/a	n/a	n/a	n/a	n/a	n/a	n/a	n/a	n/a	8.45	0.82
2	1-Nonanol	16.81	n/a	n/a	n/a	n/a	n/a	0.12	n/a	n/a	n/a	n/a	n/a	n/a	n/a	n/a	n/a
2	(+)-Isomenthol	16.888	n/a	n/a	0.89	0.46	n/a	0.56	0.25	n/a	1.69	0.37	n/a	0.94	1.28	n/a	1.52
2	3-Cyclohexen-1-ol, 4-methyl-1-(1-methylethyl)-	17.033	n/a	n/a	n/a	n/a	0.05	0.19	0.08	0.12	0.56	0.14	0.19	0.43	0.04	0.35	0.68
2	1H-Indene, 1-methylene-	17.203	n/a	n/a	n/a	n/a	n/a	n/a	n/a	n/a	n/a	n/a	n/a	n/a	n/a	n/a	0.28
2	Terpineol	17.45	n/a	n/a	n/a	n/a	n/a	n/a	n/a	n/a	n/a	n/a	n/a	n/a	n/a	n/a	0.58
2	3-Cyclohexene-1-methanol, .alpha.,.alpha.,4-trimethyl-, (S)-	17.454	n/a	n/a	n/a	n/a	n/a	n/a	n/a	n/a	n/a	n/a	n/a	0.24	0.8	n/a	n/a
2	Benzoic acid, 2-hydroxy-, methyl ester	17.557	n/a	n/a	n/a	n/a	0.17	n/a	0.11	0.03	0.02	0.03	0.56	n/a	1.81	n/a	0.01
2	Hexadecane, 2,6,10,14-tetramethyl-	17.654	0.72	0.73	n/a	0.57	n/a	0.07	0.04	n/a	0.01	0.03	0.13	0.1	0.17	n/a	n/a
2	Decanal	17.84	n/a	n/a	n/a	n/a	0.08	0.1	0.06	0.29	0.32	0.04	n/a	n/a	n/a	n/a	n/a
2	2-Nonenal, (Z)-	19.528	n/a	n/a	n/a	n/a	n/a	n/a	n/a	n/a	n/a	n/a	n/a	0.12	0.14	n/a	n/a
2	1-Undecanol	20.385	n/a	n/a	n/a	n/a	n/a	n/a	n/a	n/a	0.14	n/a	n/a	n/a	n/a	n/a	n/a
2	2-Undecanone	19.528	n/a	n/a	n/a	n/a	n/a	0.46	0.15	0.01	0.85	0.25	n/a	n/a	n/a	n/a	n/a
2	Naphthalene, 1-methyl-	20.536	0.19	0.22	n/a	0.87	n/a	n/a	0.06	1.88	0.45	0.27	n/a	0.11	0.21	2.41	0.15
2	1H-Indene, 1-ethylidene-	20.544	n/a	n/a	n/a	n/a	n/a	n/a	n/a	n/a	n/a	n/a	n/a	0.23	n/a	n/a	n/a
2	1,4-Methanonaphthalene, 1,4-dihydro-	20.545	n/a	n/a	0.48	0.47	n/a	n/a	n/a	n/a	n/a	n/a	n/a	n/a	n/a	n/a	n/a
2	Tetradecane	20.625	n/a	n/a	n/a	n/a	n/a	n/a	n/a	0.32	0.31	0.11	n/a	n/a	n/a	n/a	0.37
2	Naphthalene, decahydro-, cis-	20.727	n/a	n/a	n/a	n/a	n/a	n/a	n/a	n/a	n/a	0.2	0.24	0.07	n/a	n/a	n/a
2	Germacrene D	21.859	n/a	n/a	n/a	n/a	n/a	0.19	n/a	n/a	n/a	n/a	n/a	0.08	0.14	n/a	n/a
2	.alpha.-Amorphene	23.026	n/a	n/a	0.5	0.35	n/a	0.13	0.09	0.01	0.01	0.01	n/a	0.3	0.46	n/a	0.36
2	1-Tetradecanol	23.198	n/a	n/a	n/a	n/a	n/a	n/a	n/a	n/a	n/a	n/a	0.5	n/a	n/a	n/a	n/a
2	Pentadecane	23.409	n/a	n/a	n/a	n/a	n/a	n/a	n/a	n/a	n/a	n/a	n/a	n/a	n/a	0.3	0.01
2	Heptadecane, 2,6,10,15-tetramethyl-	23.414	n/a	n/a	n/a	n/a	n/a	0.18	0.06	0.01	0.13	0.01	0.14	n/a	0.18	0.2	0.02
2	Hexadecane	23.415	n/a	n/a	n/a	0.27	n/a	n/a	n/a	n/a	n/a	n/a	n/a	n/a	n/a	n/a	n/a
2	,TRANS-.ALPHA.-BERGAMOTENE	23.678	n/a	n/a	0.19	0.18	0.08	0.14	0.05	0.53	6.74	1.17	0.3	0.37	0.77	0.15	1.47
2	trans-Caryophyllene	24.162	n/a	n/a	0.27	0.64	n/a	n/a	n/a	n/a	n/a	n/a	0.15	0.38	2.48	2.61	0.91
2	(+)-.BETA.-FUNEBRENE	24.222	0.24	0.26	n/a	n/a	n/a	0.08	n/a	n/a	0.15	n/a	n/a	n/a	n/a	n/a	n/a
2	Pentatriacontane	24.916	n/a	n/a	n/a	n/a	n/a	n/a	n/a	n/a	n/a	n/a	0.17	n/a	0.24	n/a	n/a
2	.alpha.-Humulene	25.077	n/a	n/a	n/a	n/a	n/a	n/a	n/a	n/a	n/a	n/a	n/a	n/a	n/a	0.95	0.41
2	Octane	25.082	n/a	n/a	n/a	n/a	n/a	n/a	n/a	n/a	n/a	n/a	n/a	0.1	0.2	n/a	n/a
2	Undecanal	26.358	n/a	n/a	n/a	n/a	n/a	n/a	n/a	0.38	1.51	n/a	n/a	n/a	n/a	n/a	n/a
2	Phenol, 2,6-bis(1,1-dimethylethyl)-4-methyl-	26.497	n/a	n/a	n/a	n/a	n/a	n/a	n/a	0.15	n/a	n/a	n/a	0.08	0.15	n/a	n/a
2	Benzene, 1,2,3-trimethoxy-5-(2-propenyl)-	27.528	0.32	0.36	n/a	n/a	n/a	0.43	n/a	n/a	n/a	n/a	2.82	0.68	1.1	0.64	0.02
2	3-Hexen-1-ol, benzoate, (Z)-	27.969	0.65	0.65	n/a	n/a	0.14	n/a	n/a	1.43	n/a	n/a	0.95	n/a	0.53	n/a	n/a
2	Hexadecanoic acid, ethyl ester	28.429	n/a	n/a	n/a	n/a	n/a	n/a	n/a	n/a	n/a	n/a	n/a	n/a	n/a	0.27	0.02
2	1,2-Benzenedicarboxylic acid, diethyl ester	28.536	1	1.02	1.6	1.45	n/a	n/a	n/a	0.11	0.34	0.22	n/a	n/a	n/a	n/a	n/a
2	1-Iodo-2-methylnonane	28.55	n/a	n/a	n/a	n/a	n/a	n/a	n/a	n/a	n/a	n/a	n/a	n/a	n/a	n/a	0.02
2	Decane, 2-methyl-	28.553	n/a	n/a	n/a	n/a	n/a	n/a	n/a	n/a	0.8	0.32	n/a	n/a	n/a	n/a	n/a
2	.alpha.-Cedrol	28.936	2.54	2.57	0.39	0.26	n/a	0.12	n/a	n/a	0.83	0.25	n/a	0.36	0.12	n/a	n/a
2	Octane, 3,5-dimethyl-	29.728	n/a	n/a	n/a	0.24	n/a	0.12	n/a	n/a	0.27	0.1	n/a	n/a	n/a	n/a	n/a
2	Dodecane, 2,6,10-trimethyl-	33.393	n/a	n/a	n/a	n/a	n/a	0.21	n/a	n/a	n/a	0.23	n/a	n/a	n/a	n/a	n/a
2	1,2-Benzenedicarboxylic acid, bis(2-methylpropyl) ester	34.753	0.6	0.6	0.46	1.46	n/a	n/a	n/a	n/a	0.36	0.2	n/a	n/a	n/a	n/a	n/a
2	1,2-Benzenedicarboxylic acid, dibutyl ester	36.723	0.36	0.37	n/a	n/a	n/a	n/a	n/a	n/a	n/a	n/a	n/a	n/a	n/a	n/a	n/a
2	3-Acetyl-2-methyl-9b-(1-naphthyl)-3aH-benzo[e]cyclohexa[1,2-b]furan	37.001	n/a	n/a	n/a	n/a	n/a	n/a	n/a	n/a	0.18	0.11	0.12	0.1	0.17	0.19	0.12
3	Acetic acid, ethyl ester	2.244	n/a	n/a	n/a	0.01	n/a	n/a	n/a	n/a	n/a	n/a	n/a	n/a	0.23	0.16	n/a
3	UREA	2.624	n/a	n/a	0.07	n/a	n/a	0.02	n/a	0.09	n/a	n/a	n/a	0.41	0.33	0.41	0.08
3	1-Penten-3-ol	2.979	n/a	n/a	n/a	n/a	n/a	n/a	n/a	0.12	n/a	n/a	n/a	n/a	n/a	n/a	n/a
3	3-PENTANONE	3.182	n/a	n/a	n/a	0.41	0.02	0.02	n/a	n/a	0.04	n/a	n/a	n/a	n/a	n/a	n/a
3	1-Butanol, 3-methyl- (impure)	3.827	n/a	n/a	n/a	n/a	n/a	n/a	n/a	n/a	n/a	0.33	0.22	0.23	2.24	0.61	1.17
3	1-Pentanol	4.512	n/a	n/a	n/a	n/a	n/a	n/a	n/a	0.34	n/a	n/a	n/a	n/a	n/a	n/a	n/a
3	Hexanal	5.227	n/a	0.13	0.08	n/a	0.02	n/a	n/a	0.23	n/a	n/a	n/a	n/a	n/a	n/a	n/a
3	3-Hexen-1-ol	6.718	n/a	n/a	n/a	4.85	0.73	0.48	4.47	n/a	n/a	0.2	2.5	2.46	n/a	n/a	n/a
3	1-HEXANOL	7.177	n/a	0.83	0.16	0.45	2.22	0.36	0.46	1.16	n/a	6.62	19.34	1.21	n/a	1.79	1.4
3	Cyclohexanol	7.619	n/a	n/a	n/a	n/a	n/a	n/a	n/a	n/a	n/a	0.51	0.55	n/a	n/a	n/a	n/a
3	1,3,5,7-Cyclooctatetraene	7.783	n/a	n/a	n/a	n/a	n/a	n/a	n/a	n/a	n/a	n/a	n/a	n/a	3.66	1.78	13.21
3	Oxime-, methoxy-phenyl-	8.5	3.96	14.13	18.94	2.01	4.38	4.49	4.93	n/a	1.1	7.5	5.95	3.76	n/a	n/a	n/a
3	Benzene, 1-(dimethoxymethyl)-4-(1-methoxy-1-methylethyl)-	9.986	n/a	1.87	1.91	0.25	0.48	0.35	1.18	0.99	0.48	1	0.62	1.06	1.13	0.9	n/a
3	1-Heptanol	10.375	n/a	n/a	n/a	n/a	n/a	n/a	n/a	n/a	n/a	0.04	0.14	n/a	n/a	0.42	n/a
3	1-Octen-3-ol	10.648	n/a	n/a	n/a	n/a	n/a	n/a	n/a	n/a	n/a	n/a	n/a	n/a	n/a	n/a	9.5
3	3-Octanone	10.861	0.6	n/a	3.71	1.7	2.91	6.59	n/a	0.51	0.11	n/a	n/a	n/a	4.48	1.25	4.73
3	Furan, 2-pentyl-	11.024	n/a	0.66	0.44	0.02	1.33	0.5	0.24	1.84	0.5	0.21	1.24	1.6	0.42	3.95	2.15
3	3-Octanol	11.169	0.59	0.42	3.16	5.77	0.27	4.48	n/a	n/a	n/a	n/a	0.08	0.28	2.23	0.15	3.2
3	Octanal	11.386	n/a	n/a	n/a	n/a	n/a	n/a	n/a	0.53	n/a	0.18	0.16	0.23	n/a	n/a	n/a
3	l-Limonene	12.236	n/a	n/a	n/a	0.08	n/a	0.18	0.61	0.93	n/a	0.53	n/a	1.89	0.83	1	0.62
3	1,8-Cineole	12.325	n/a	0.45	0.25	n/a	0.17	0.07	0.21	0.43	n/a	0.15	0.25	0.59	0.14	0.35	0.15
3	1-Octanol	13.609	n/a	n/a	n/a	n/a	2.42	n/a	n/a	n/a	n/a	n/a	n/a	n/a	n/a	n/a	n/a
3	2-Nonanone	14.279	n/a	n/a	n/a	n/a	n/a	n/a	n/a	0.35	0.03	n/a	n/a	n/a	0.32	1.66	0.46
3	.ALPHA.-TERPINOLENE	14.542	n/a	n/a	n/a	0.13	0.56	0.28	n/a	n/a	n/a	n/a	n/a	n/a	n/a	n/a	n/a
3	Nonanal	14.667	0.39	0.21	0.16	n/a	0.44	0.1	0.8	2.04	0.43	0.67	0.92	0.57	0.43	0.77	0.6
3	2,5-Dihydroxybenzaldehyde, 2TMS derivative	15.062	n/a	n/a	n/a	n/a	n/a	n/a	n/a	n/a	n/a	n/a	n/a	n/a	n/a	0.66	0.49
3	Camphor	16	n/a	n/a	n/a	n/a	n/a	n/a	n/a	n/a	n/a	n/a	0.05	0.07	n/a	0.07	0.02
3	Ethanone, 1-(2-methylphenyl)-	16.218	n/a	n/a	n/a	n/a	n/a	n/a	n/a	n/a	n/a	n/a	n/a	n/a	8.43	0.77	1.51
3	1-Nonanol	16.81	n/a	n/a	n/a	n/a	0.08	n/a	n/a	n/a	n/a	n/a	n/a	n/a	n/a	n/a	n/a
3	(+)-Isomenthol	16.888	n/a	0.88	0.42	n/a	0.48	0.23	n/a	1.67	0.32	n/a	0.9	1.22	n/a	1.48	1.01
3	3-Cyclohexen-1-ol, 4-methyl-1-(1-methylethyl)-	17.033	n/a	n/a	n/a	0.02	0.15	0.07	0.08	0.52	0.08	0.16	0.35	n/a	0.31	0.6	0.46
3	1H-Indene, 1-methylene-	17.203	n/a	n/a	n/a	n/a	n/a	n/a	n/a	n/a	n/a	n/a	n/a	n/a	n/a	0.23	n/a
3	Terpineol	17.45	n/a	n/a	n/a	n/a	n/a	n/a	n/a	n/a	n/a	n/a	n/a	n/a	n/a	0.51	0.26
3	3-Cyclohexene-1-methanol, .alpha.,.alpha.,4-trimethyl-, (S)-	17.454	n/a	n/a	n/a	n/a	n/a	n/a	n/a	n/a	n/a	n/a	0.2	0.77	n/a	n/a	n/a
3	Benzoic acid, 2-hydroxy-, methyl ester	17.557	n/a	n/a	n/a	0.14	n/a	0.05	n/a	n/a	n/a	0.53	n/a	1.75	n/a	n/a	1.02
3	Hexadecane, 2,6,10,14-tetramethyl-	17.654	0.7	n/a	0.5	n/a	0	n/a	n/a	n/a	n/a	0.07	0.05	0.1	n/a	n/a	0.09
3	Decanal	17.84	n/a	n/a	n/a	0.07	0.09	0.02	0.23	0.28	n/a	n/a	n/a	n/a	n/a	n/a	n/a
3	2-Nonenal, (Z)-	19.528	n/a	n/a	n/a	n/a	n/a	n/a	n/a	n/a	n/a	n/a	0.07	0.1	n/a	n/a	n/a
3	1-Undecanol	20.385	n/a	n/a	n/a	n/a	n/a	n/a	n/a	0.08	n/a	n/a	n/a	n/a	n/a	n/a	n/a
3	2-Undecanone	19.528	n/a	n/a	n/a	n/a	0.4	0.12	n/a	0.82	0.19	n/a	n/a	n/a	n/a	n/a	n/a
3	Naphthalene, 1-methyl-	20.536	0.15	n/a	0.83	n/a	n/a	0.03	1.81	0.41	0.21	n/a	0.08	0.17	2.37	0.11	n/a
3	1H-Indene, 1-ethylidene-	20.544	n/a	n/a	n/a	n/a	n/a	n/a	n/a	n/a	n/a	n/a	0.18	n/a	n/a	n/a	n/a
3	1,4-Methanonaphthalene, 1,4-dihydro-	20.545	n/a	0.41	0.41	n/a	n/a	n/a	n/a	n/a	n/a	n/a	n/a	n/a	n/a	n/a	n/a
3	Tetradecane	20.625	n/a	n/a	n/a	n/a	n/a	n/a	0.3	0.26	0.03	n/a	n/a	n/a	n/a	0.34	n/a
3	Naphthalene, decahydro-, cis-	20.727	n/a	n/a	n/a	n/a	n/a	n/a	n/a	n/a	0.16	0.19	0.03	n/a	n/a	n/a	n/a
3	Germacrene D	21.859	n/a	n/a	n/a	n/a	0.19	n/a	n/a	n/a	n/a	n/a	0.06	0.06	n/a	n/a	n/a
3	.alpha.-Amorphene	23.026	n/a	0.45	0.29	n/a	0.06	0.05	n/a	n/a	n/a	n/a	0.25	0.42	n/a	0.35	0.29
3	1-Tetradecanol	23.198	n/a	n/a	n/a	n/a	n/a	n/a	n/a	n/a	n/a	0.44	n/a	n/a	n/a	n/a	n/a
3	Pentadecane	23.409	n/a	n/a	n/a	n/a	n/a	n/a	n/a	n/a	n/a	n/a	n/a	n/a	0.27	n/a	0.29
3	Heptadecane, 2,6,10,15-tetramethyl-	23.414	n/a	n/a	n/a	n/a	0.11	0.02	n/a	0.12	n/a	0.11	n/a	0.17	0.15	n/a	0.16
3	Hexadecane	23.415	n/a	n/a	0.23	n/a	n/a	n/a	n/a	n/a	n/a	n/a	n/a	n/a	n/a	n/a	n/a
3	,TRANS-.ALPHA.-BERGAMOTENE	23.678	n/a	0.17	0.15	0.04	0.11	n/a	0.44	6.69	1.09	0.28	0.32	0.72	0.12	1.41	0.2
3	trans-Caryophyllene	24.162	n/a	0.22	0.6	n/a	n/a	n/a	n/a	n/a	n/a	0.14	0.32	2.42	2.59	0.87	1.65
3	(+)-.BETA.-FUNEBRENE	24.222	0.21	n/a	n/a	n/a	0.05	n/a	n/a	0.14	n/a	n/a	n/a	n/a	n/a	n/a	n/a
3	Pentatriacontane	24.916	n/a	n/a	n/a	n/a	n/a	n/a	n/a	n/a	n/a	0.14	n/a	0.23	n/a	n/a	n/a
3	.alpha.-Humulene	25.077	n/a	n/a	n/a	n/a	n/a	n/a	n/a	n/a	n/a	n/a	n/a	n/a	0.95	0.36	0.73
3	Octane	25.082	n/a	n/a	n/a	n/a	n/a	n/a	n/a	n/a	n/a	n/a	0.04	0.16	n/a	n/a	n/a
3	Undecanal	26.358	n/a	n/a	n/a	n/a	n/a	n/a	0.3	1.47	n/a	n/a	n/a	n/a	n/a	n/a	n/a
3	Phenol, 2,6-bis(1,1-dimethylethyl)-4-methyl-	26.497	n/a	n/a	n/a	n/a	n/a	n/a	0.11	n/a	n/a	n/a	0.05	0.11	n/a	n/a	n/a
3	Benzene, 1,2,3-trimethoxy-5-(2-propenyl)-	27.528	0.3	n/a	n/a	n/a	0.37	n/a	n/a	n/a	n/a	2.77	0.6	1.05	0.56	n/a	1
3	3-Hexen-1-ol, benzoate, (Z)-	27.969	0.64	n/a	n/a	0.12	n/a	n/a	1.36	n/a	n/a	0.91	n/a	0.5	n/a	n/a	n/a
3	Hexadecanoic acid, ethyl ester	28.429	n/a	n/a	n/a	n/a	n/a	n/a	n/a	n/a	n/a	n/a	n/a	n/a	0.19	n/a	0.05
3	1,2-Benzenedicarboxylic acid, diethyl ester	28.536	1	1.52	1.42	n/a	n/a	n/a	0.07	0.33	0.16	n/a	n/a	n/a	n/a	n/a	n/a
3	1-Iodo-2-methylnonane	28.55	n/a	n/a	n/a	n/a	n/a	n/a	n/a	n/a	n/a	n/a	n/a	n/a	n/a	n/a	0.34
3	Decane, 2-methyl-	28.553	n/a	n/a	n/a	n/a	n/a	n/a	n/a	0.74	0.28	n/a	n/a	n/a	n/a	n/a	n/a
3	.alpha.-Cedrol	28.936	2.5	0.37	0.2	n/a	0.07	n/a	n/a	0.77	0.2	n/a	0.35	0.08	n/a	n/a	n/a
3	Octane, 3,5-dimethyl-	29.728	n/a	n/a	0.21	n/a	0.06	n/a	n/a	0.25	0.06	n/a	n/a	n/a	n/a	n/a	n/a
3	Dodecane, 2,6,10-trimethyl-	33.393	n/a	n/a	n/a	n/a	0.15	n/a	n/a	n/a	0.19	n/a	n/a	n/a	n/a	n/a	n/a
3	1,2-Benzenedicarboxylic acid, bis(2-methylpropyl) ester	34.753	0.57	0.41	1.43	n/a	n/a	n/a	n/a	0.28	0.17	n/a	n/a	n/a	n/a	n/a	n/a
3	1,2-Benzenedicarboxylic acid, dibutyl ester	36.723	0.35	n/a	n/a	n/a	n/a	n/a	n/a	n/a	n/a	n/a	n/a	n/a	n/a	n/a	n/a
3	3-Acetyl-2-methyl-9b-(1-naphthyl)-3aH-benzo[e]cyclohexa[1,2-b]furan	37.001	n/a	n/a	n/a	n/a	n/a	n/a	n/a	0.13	0.06	0.05	0.04	0.14	0.12	0.12	0.16
